# Supplementary material for: Expression pattern of four storage xyloglucan mobilization-related genes during seedling development of the rain forest tree Hymenaea courbaril L
Source: PubMed Central journal article supplement — J Exp Bot. 2009 Feb 16;60(4):1191–206. doi: 10.1093/jxb/erp014 (PMC2657543; doi:10.1093/jxb/erp014), 2009-02-16
Supplement: erp014_1.pdf [file erp014_1.pdf]

**Expression pattern of four storage xyloglucan mobilisation related genes during seedling development of the rain forest tree *Hymenaea courbaril* L.**

Brandão, A.D., Del Bem, L.E.V., Vincentz, M. & Buckeridge, M.S.

**Table S1.** Accessions numbers of sequences used in phylogenetic analyses.

## **β-Galactosidase**

| <b>Accession number</b> | <b>Gene name</b> | <b>Organism</b>             |
|-------------------------|------------------|-----------------------------|
| EU370969                | <i>HcBGAL1</i>   | <i>Hymenaea courbaril</i>   |
| CAA09457                | <i>CanBGAL-4</i> | <i>Cicer arietinum</i>      |
| CAA06309                | <i>CanBGAL-3</i> | <i>Cicer arietinum</i>      |
| AJ012687                |                  | <i>Cicer arietinum</i>      |
| AT3G13750               | <i>At-BGAL1</i>  | <i>Arabidopsis thaliana</i> |
| AT3G52840               | <i>At-BGAL2</i>  | <i>Arabidopsis thaliana</i> |
| AT4G36360               | <i>At-BGAL3</i>  | <i>Arabidopsis thaliana</i> |
| AT5G56870               | <i>At-BGAL4</i>  | <i>Arabidopsis thaliana</i> |
| AT1G45130               | <i>At-BGAL5</i>  | <i>Arabidopsis thaliana</i> |
| AT5G63800               | <i>At-BGAL6</i>  | <i>Arabidopsis thaliana</i> |
| AT5G20710               | <i>At-BGAL7</i>  | <i>Arabidopsis thaliana</i> |
| AT2G28470               | <i>At-BGAL8</i>  | <i>Arabidopsis thaliana</i> |
| AT2G32810               | <i>At-BGAL9</i>  | <i>Arabidopsis thaliana</i> |
| AT5G63810               | <i>At-BGAL10</i> | <i>Arabidopsis thaliana</i> |
| AT4G35010               | <i>At-BGAL11</i> | <i>Arabidopsis thaliana</i> |
| AT4G26140               | <i>At-BGAL12</i> | <i>Arabidopsis thaliana</i> |
| AT2G16730               | <i>At-BGAL13</i> | <i>Arabidopsis thaliana</i> |
| AT4G38590               | <i>At-BGAL14</i> | <i>Arabidopsis thaliana</i> |
| AT1G31740               | <i>At-BGAL15</i> | <i>Arabidopsis thaliana</i> |
| AT1G77410               | <i>At-BGAL16</i> | <i>Arabidopsis thaliana</i> |
| AT1G72990               | <i>At-BGAL17</i> | <i>Arabidopsis thaliana</i> |
| Os01g0580200            |                  | <i>Oryza sativa</i>         |
| Os01g0875500            |                  | <i>Oryza sativa</i>         |
| Os03g0165400            |                  | <i>Oryza sativa</i>         |
| Os03g0255100            |                  | <i>Oryza sativa</i>         |
| Os06g0573600            |                  | <i>Oryza sativa</i>         |
| Os08g0549200            |                  | <i>Oryza sativa</i>         |
| Os12g0429200            |                  | <i>Oryza sativa</i>         |
| NP920740                |                  | <i>Oryza sativa</i>         |
| XP475258                |                  | <i>Oryza sativa</i>         |
| AF020390                |                  | <i>Solanum lycopersicum</i> |
| AJ012796                |                  | <i>Solanum lycopersicum</i> |
| AJ012798                |                  | <i>Solanum lycopersicum</i> |
| AJ278703                |                  | <i>Fragaria x ananassa</i>  |
| AJ278705                |                  | <i>Fragaria x ananassa</i>  |
| L29451                  |                  | <i>Malus domestica</i>      |

## XTH

| Accession number | Gene name       | Organism                    |
|------------------|-----------------|-----------------------------|
| EU370971         | <i>HcXTH1</i>   | <i>Hymenaea courbaril</i>   |
| AB086396         | <i>Va-XTH2</i>  | <i>Vigna angularis</i>      |
| AB086395         | <i>Va-XTH1</i>  | <i>Vigna angularis</i>      |
| AT4G13080        | <i>At-XTH1</i>  | <i>Arabidopsis thaliana</i> |
| AT4G13090        | <i>At-XTH2</i>  | <i>Arabidopsis thaliana</i> |
| AT3G25050        | <i>At-XTH3</i>  | <i>Arabidopsis thaliana</i> |
| AT2G06850        | <i>At-XTH4</i>  | <i>Arabidopsis thaliana</i> |
| AT5G13870        | <i>At-XTH5</i>  | <i>Arabidopsis thaliana</i> |
| AT5G65730        | <i>At-XTH6</i>  | <i>Arabidopsis thaliana</i> |
| AT4G37800        | <i>At-XTH7</i>  | <i>Arabidopsis thaliana</i> |
| AT1G11545        | <i>At-XTH8</i>  | <i>Arabidopsis thaliana</i> |
| AT4G03210        | <i>At-XTH9</i>  | <i>Arabidopsis thaliana</i> |
| AT2G14620        | <i>At-XTH10</i> | <i>Arabidopsis thaliana</i> |
| AT3G48580        | <i>At-XTH11</i> | <i>Arabidopsis thaliana</i> |
| AT5G57530        | <i>At-XTH12</i> | <i>Arabidopsis thaliana</i> |
| AT5G57540        | <i>At-XTH13</i> | <i>Arabidopsis thaliana</i> |
| AT4G25820        | <i>At-XTH14</i> | <i>Arabidopsis thaliana</i> |
| AT4G14130        | <i>At-XTH15</i> | <i>Arabidopsis thaliana</i> |
| AT3G23730        | <i>At-XTH16</i> | <i>Arabidopsis thaliana</i> |
| AT1G65310        | <i>At-XTH17</i> | <i>Arabidopsis thaliana</i> |
| AT4G30280        | <i>At-XTH18</i> | <i>Arabidopsis thaliana</i> |
| AT4G30290        | <i>At-XTH19</i> | <i>Arabidopsis thaliana</i> |
| AT5G48070        | <i>At-XTH20</i> | <i>Arabidopsis thaliana</i> |
| AT2G18800        | <i>At-XTH21</i> | <i>Arabidopsis thaliana</i> |
| AT5G57560        | <i>At-XTH22</i> | <i>Arabidopsis thaliana</i> |
| AT4G25810        | <i>At-XTH23</i> | <i>Arabidopsis thaliana</i> |
| AT4G30270        | <i>At-XTH24</i> | <i>Arabidopsis thaliana</i> |
| AT5G57550        | <i>At-XTH25</i> | <i>Arabidopsis thaliana</i> |
| AT4G28850        | <i>At-XTH26</i> | <i>Arabidopsis thaliana</i> |
| AT2G01850        | <i>At-XTH27</i> | <i>Arabidopsis thaliana</i> |
| AT1G14720        | <i>At-XTH28</i> | <i>Arabidopsis thaliana</i> |
| AT4G18990        | <i>At-XTH29</i> | <i>Arabidopsis thaliana</i> |
| AT1G32170        | <i>At-XTH30</i> | <i>Arabidopsis thaliana</i> |
| AT3G44990        | <i>At-XTH31</i> | <i>Arabidopsis thaliana</i> |
| AT2G36870        | <i>At-XTH32</i> | <i>Arabidopsis thaliana</i> |
| AT1G10550        | <i>At-XTH33</i> | <i>Arabidopsis thaliana</i> |
| Os02g0127800     |                 | <i>Oryza sativa</i>         |
| Os03g0108300     |                 | <i>Oryza sativa</i>         |
| Os03g0239000     |                 | <i>Oryza sativa</i>         |
| Os03g0854600     |                 | <i>Oryza sativa</i>         |
| Os03g0117300     |                 | <i>Oryza sativa</i>         |
| Os04g0604200     |                 | <i>Oryza sativa</i>         |

|              |                        |
|--------------|------------------------|
| Os06g0696400 | <i>Oryza sativa</i>    |
| Os06g0696600 | <i>Oryza sativa</i>    |
| Os06g0697000 | <i>Oryza sativa</i>    |
| Os07g0480800 | <i>Oryza sativa</i>    |
| Os08g0237800 | <i>Oryza sativa</i>    |
| Os08g0240500 | <i>Oryza sativa</i>    |
| Os08g0237000 | <i>Oryza sativa</i>    |
| Os11g0539200 | <i>Oryza sativa</i>    |
| AA39950      | <i>Tropaolum majus</i> |

## Alkaline invertase

|           |                 |                             |
|-----------|-----------------|-----------------------------|
| EU370968  | <i>HcAlkIN1</i> | <i>Hymenaea courbaril</i>   |
| AT1G35580 |                 | <i>Arabidopsis thaliana</i> |
| AT1G22650 |                 | <i>Arabidopsis thaliana</i> |
| AT1G72000 |                 | <i>Arabidopsis thaliana</i> |
| AT1G56560 |                 | <i>Arabidopsis thaliana</i> |
| AT3G05820 |                 | <i>Arabidopsis thaliana</i> |
| AT3G06500 |                 | <i>Arabidopsis thaliana</i> |
| AT4G09510 |                 | <i>Arabidopsis thaliana</i> |
| AT4G34860 |                 | <i>Arabidopsis thaliana</i> |
| AT5G22510 |                 | <i>Arabidopsis thaliana</i> |
| AY575558  | <i>OsNIN1</i>   | <i>Oryza sativa</i>         |
| AY575559  | <i>OsNIN2</i>   | <i>Oryza sativa</i>         |
| AY575560  | <i>OsNIN3</i>   | <i>Oryza sativa</i>         |
| AY575561  | <i>OsNIN4</i>   | <i>Oryza sativa</i>         |
| AY575562  | <i>OsNIN5</i>   | <i>Oryza sativa</i>         |
| AY575563  | <i>OsNIN6</i>   | <i>Oryza sativa</i>         |
| AY575564  | <i>OsNIN7</i>   | <i>Oryza sativa</i>         |
| AY575565  | <i>OsNIN8</i>   | <i>Oryza sativa</i>         |

## Sucrose synthase

|           |                   |                             |
|-----------|-------------------|-----------------------------|
| EU370970  | <i>HcSUS1</i>     | <i>Hymenaea courbaril</i>   |
| P31926    | <i>SUSY VICFA</i> | <i>Vicia faba</i>           |
| O65026    | <i>SUSY MEDSA</i> | <i>Medicago sativa</i>      |
| Q01390    | <i>SUSY PHAAU</i> | <i>Vigna radiata</i>        |
| CAC32462  | <i>SUS3</i>       | <i>Pisum sativum</i>        |
| CAA09910  |                   | <i>Pisum sativum</i>        |
| ACC28107  | <i>SUS</i>        | <i>Pisum sativum</i>        |
| CAB40794  |                   | <i>Medicago truncatula</i>  |
| ABP88869  |                   | <i>Medicago sativa</i>      |
| P13708    | <i>SUSY SOYBN</i> | <i>Glycine max</i>          |
| AAN76498  |                   | <i>Phaseolus vulgaris</i>   |
| AT5G20830 | <i>At-SUS1</i>    | <i>Arabidopsis thaliana</i> |

|              |                |                             |
|--------------|----------------|-----------------------------|
| AT5G49190    | <i>At-SUS2</i> | <i>Arabidopsis thaliana</i> |
| AT4G02280    | <i>At-SUS3</i> | <i>Arabidopsis thaliana</i> |
| AT3G43190    | <i>At-SUS4</i> | <i>Arabidopsis thaliana</i> |
| AT5G37180    | <i>At-SUS5</i> | <i>Arabidopsis thaliana</i> |
| AT1G73370    | <i>At-SUS6</i> | <i>Arabidopsis thaliana</i> |
| Os02g0831500 |                | <i>Oryza sativa</i>         |
| Os03g0340500 |                | <i>Oryza sativa</i>         |
| Os03g0401300 |                | <i>Oryza sativa</i>         |
| Os04g0309600 |                | <i>Oryza sativa</i>         |
| Os06g0194900 |                | <i>Oryza sativa</i>         |
| Os07g0616800 |                | <i>Oryza sativa</i>         |

**Table S2.** Primers sequences used to obtain partial cDNA for PCR and RT-PCR experiments

| Gene         | Primer Foward - 5'                      | Primer Reverse - 5'                      | Length |
|--------------|-----------------------------------------|------------------------------------------|--------|
| <b>BG</b>    | * 1. GTTGAAATAACAAGATTC                 | *1'. CAAWGAAATCCAGAAGGRTC                | 435pb  |
|              | * 2. CAAGATTCCTTACTTAGTGTTG             | *2'. CCAGAAGGKTCWCCTCCCATTC              | 400pb  |
|              | A. GCGTCATAGTCATAGCTTG                  | A. CAGATTGAGAACGAGTATGG                  |        |
| <b>XTH</b>   | *1. GGTTCTGGTGATTC(A/T)GCTGG            | *1'. GATTC(A/T)GCTGG(A/C)ACAGT(C/T)ACTGC | 333pb  |
|              | *2. GCCCA(G/A)TCATC(A/T)GCATTCC         | *2'. C(A/T)GCATTCCA(C/T)AAACT(G/A)TTG    | 330pb  |
|              | A. CTGCTGGAACAGTTACTGC                  | A. CTGCATTCCATAAACTGTTG                  |        |
| <b>AlkIn</b> | *1. CTTGTGCTGA(C/T)GG(T/A)TG(T/C)TC     | *1'. GAAGAAGACAA(C/T)C(A/T)(G/C)ATGAAACC | 819pb  |
|              | *2. GGTTTCAT(G/C)(A/T)G(C/T)TTGTCTTCTTC | *2'. GAT(A/G)TC(A/G)CTTGAAGAAGAC         | 440pb  |
|              | A. GAACGGTTGCTCTATGGTTG                 | A. CACCAGAGCAATCAATGGC                   |        |
| <b>SUS</b>   | *1. TGGCACATAA(T/C)T(A/G)GGTG           | *1'. A(T/C)T(A/G)GGTGCACTCAGTG           | 1146pb |
|              | *2. CAATTTGCGGTACTTGAGAG                | 2'. TACTTGACAGCATAGAACATC                | 410pb  |
|              | A. GATCTGCGACACCAAGGGAG                 | A. TACTTGACAGCATAGAACATC                 |        |
| <b>Actin</b> | *1. ATTGT(A/T)GGTCGTCC(A/T)CGTCACAC     | *1. CCAGAATCCA(A/G)(A/C)ACAATACC         | 371pb  |
|              | A. GTCGTCCACGTCACTG                     | A. CCAGAATCCAGCACAATACC                  | 360pb  |

BG =  $\beta$ -Galactosidase; XTH = xyloglucan endotransglycosylase hydrolase; AlkIn = Alkaline invertase; SUS = sucrose synthase; \* = nested degenerate primers for Leguminosae. A = specific primers for *Hymenaea courbaril*.
